# Supplementary material for: Insulin-like 3 Affects Zebrafish Spermatogenic Cells Directly and via Sertoli Cells
Source: Research Square preprint supplement (doi:10.21203/rs.3.rs-94688/v1), 2020-10-23
Supplement: Supplementary file 2 [file 9db67355cd086f48992729ff.docx]

**Supplementary Information**

**Insulin-like 3 affects zebrafish spermatogenic cells directly and via Sertoli cells**


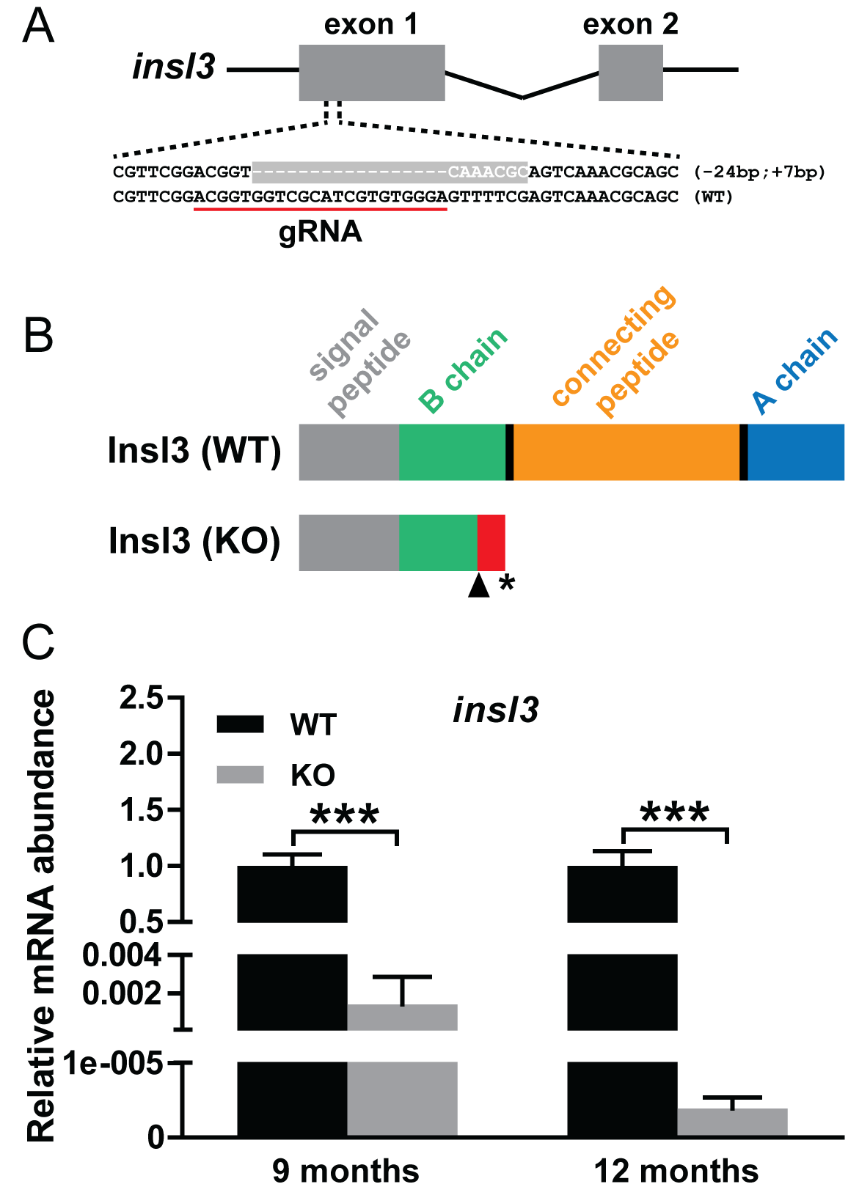


**Supplementary Fig. 1.** **Efficient disruption of zebrafish *insl3* by CRISPR/Cas9.** **(A)** Design of the guide RNA (gRNA) target site on exon 1 targeting the *insl3* gene (underlined sequence). Representative Sanger sequencing results showing the indels identified (highlighted with a grey background) in the *insl3* mutant line generated in this study. Numbers to the right of the mutant sequence indicate the loss or gain of bases, with the number of bases deleted (-) or inserted (+). WT, wild-type; bp, base pair. **(B)** Schematic diagram showing the functional domains of the WT Insl3 protein *versus* the *insl3* knockout (KO) mutant sequence. The black arrowhead indicates the start of the indel (the insertion indicated with the red box) and the asterisk indicates a premature stop codon caused by the frame shift. Black boxes in the Insl3 precursor indicate proteolytic processing sites. **(C)** CRISPR/Cas9-mediated decrease of *insl3* transcript levels in both 9 and 12 month-old zebrafish KO testes. Data are shown as mean fold change ± SEM (N = 6-10; ***, p < 0.001) and expressed relative to the WT control group (which is set at 1).


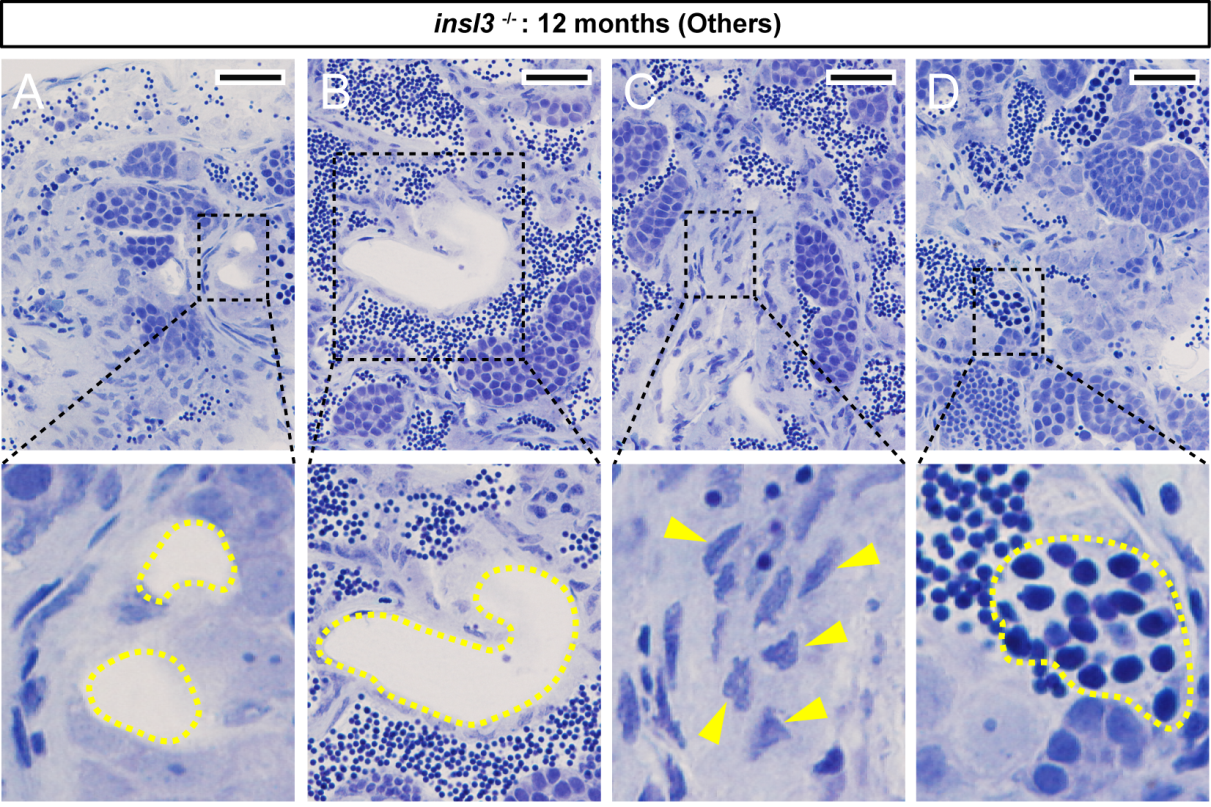


**Supplementary Fig. 2. Composition of the category** "**Others**" **shown in Fig. 2D.** **(A-D)** Areas found exclusively (A-C) or more prominently (D) in 12 months-old *insl3* knockout (*insl3*-/-) testes. (A) Empty areas adjacent to Sertoli and/or germ cells within the germinal epithelium. (B) Empty areas lined by cytoplasmic extensions of Sertoli cells within the germinal epithelium. (C) Areas containing an accumulation of Sertoli cells. (D) Areas containing apoptotic germ cells. The stippled black areas identify the magnified areas. The stippled yellow lines in A indicate empty space lined by germ and/or Sertoli cells, or lined only by Sertoli cell extensions in B, in both cases not forming part of the tubular lumen. Yellow arrowheads in C indicate areas showing an accumulation of only Sertoli cells. The yellow stippled line in D indicates a group of germ cells (type B spermatogonia) that show the typical appearance of apoptotic cells in toluidine-blue stained plastic sections (shrinkage, losing at least partially the contact with the immediate tissue environment, pyknosis/nuclear fragmentation3). Scale bars, 25 µm.


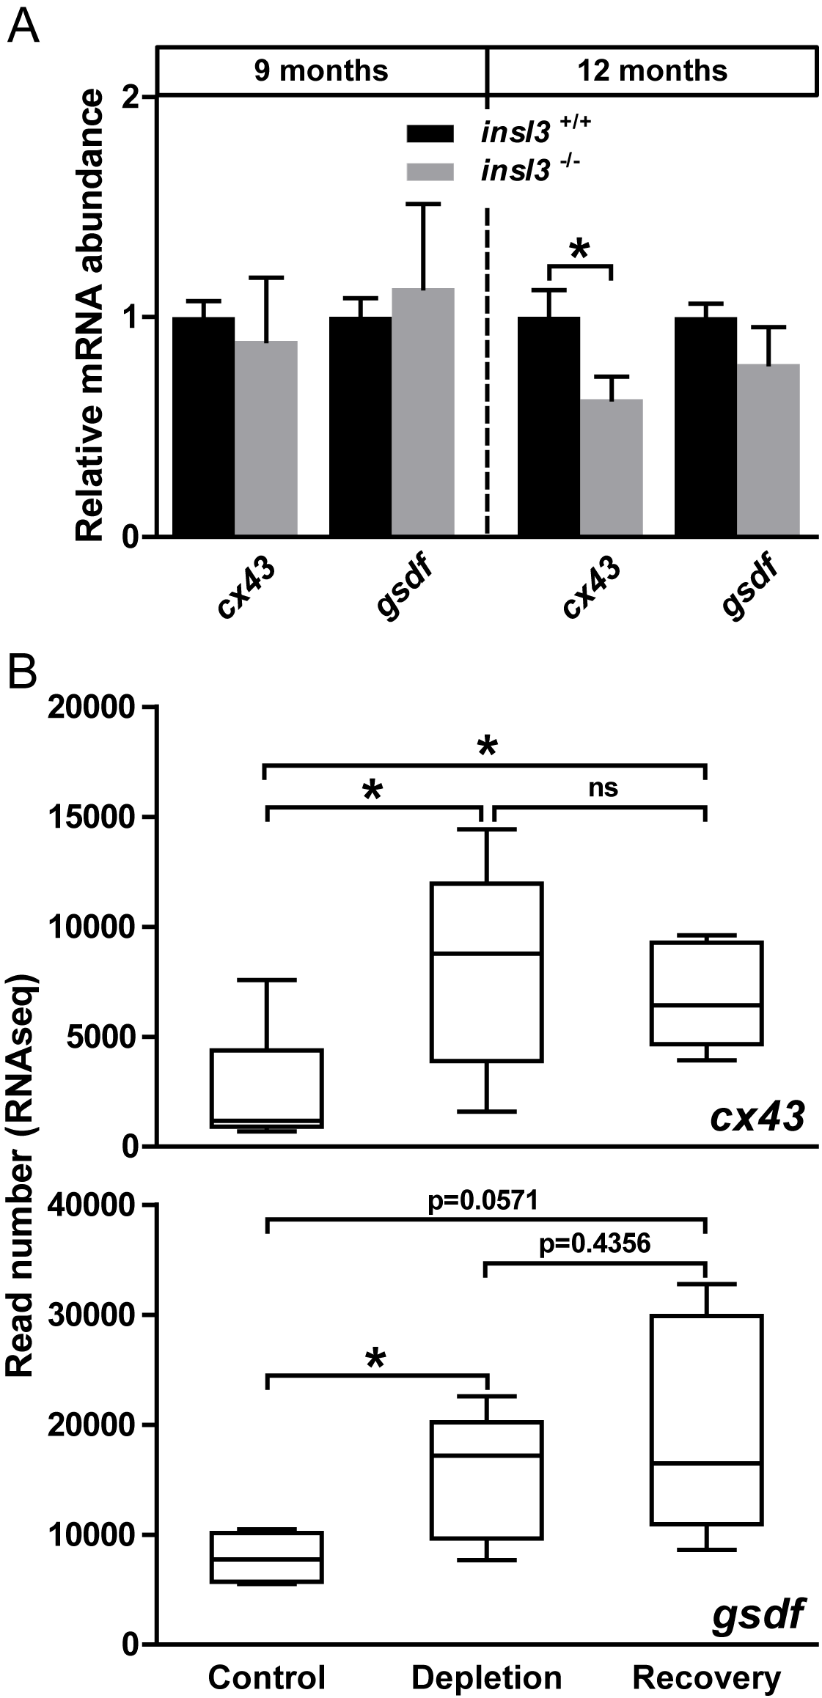


**Supplementary Fig. 3. Testicular expression of selected Sertoli cell genes in *insl3* knockout mutant gonads, and in control, depleted andrecovering gonads.** **(A)** *cx43* and *gsdf* transcript levels in wild-type (*insl3*+/+) and *insl3* knockout (*insl3*-/-) testes 9 and 12 months post-fertilization. Data are shown as mean fold change ± SEM (N = 6-10; *, p < 0.05) and expressed relative to the wild-type control group (which is set at 1). **(B)** Expression levels of *cx43* and *gsdf* in control, germ cell-depleted (by exposure to the cytostatic agent busulfan1), and testes with recovering (from busulfan) spermatogenesis, as described by Crespo et al.2 (NCBI GEO data set GSE116611). Data are expressed as mean ± SEM (N = 5; *, p < 0.05). ns, not significant differences between groups.


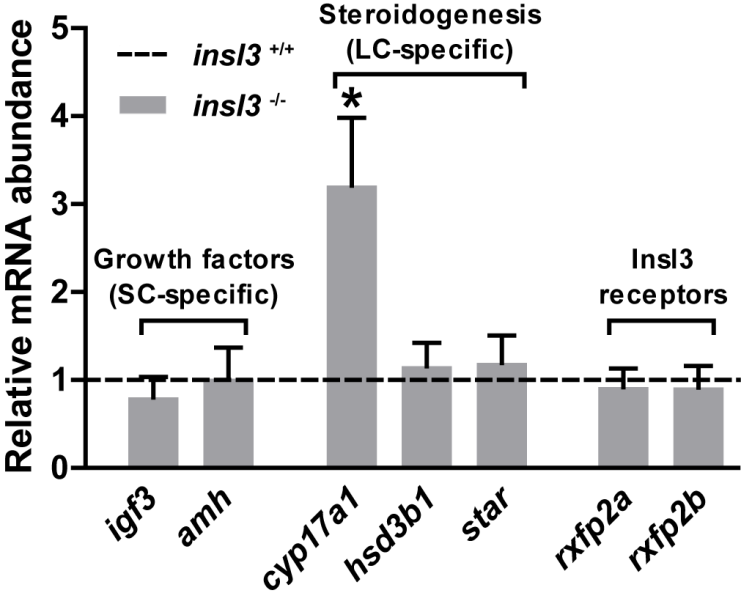


**Supplementary Fig. 4.** **Testicular expression of selected genes in 9 month-old *insl3* CRISPR-ed zebrafish.** Transcript levels of growth factors, steroidogenesis-related and Insl3 receptors in 9 month-old wild-type (*insl3*+/+) and *insl3* knockouts (*insl3*-/-) adult testis tissue. Data are mean fold change ± SEM (N = 7; * p < 0.05) and expressed as relative to the wild-type group (which is set at 1; dashed line). SC, Sertoli cell; LC, Leydig cell.


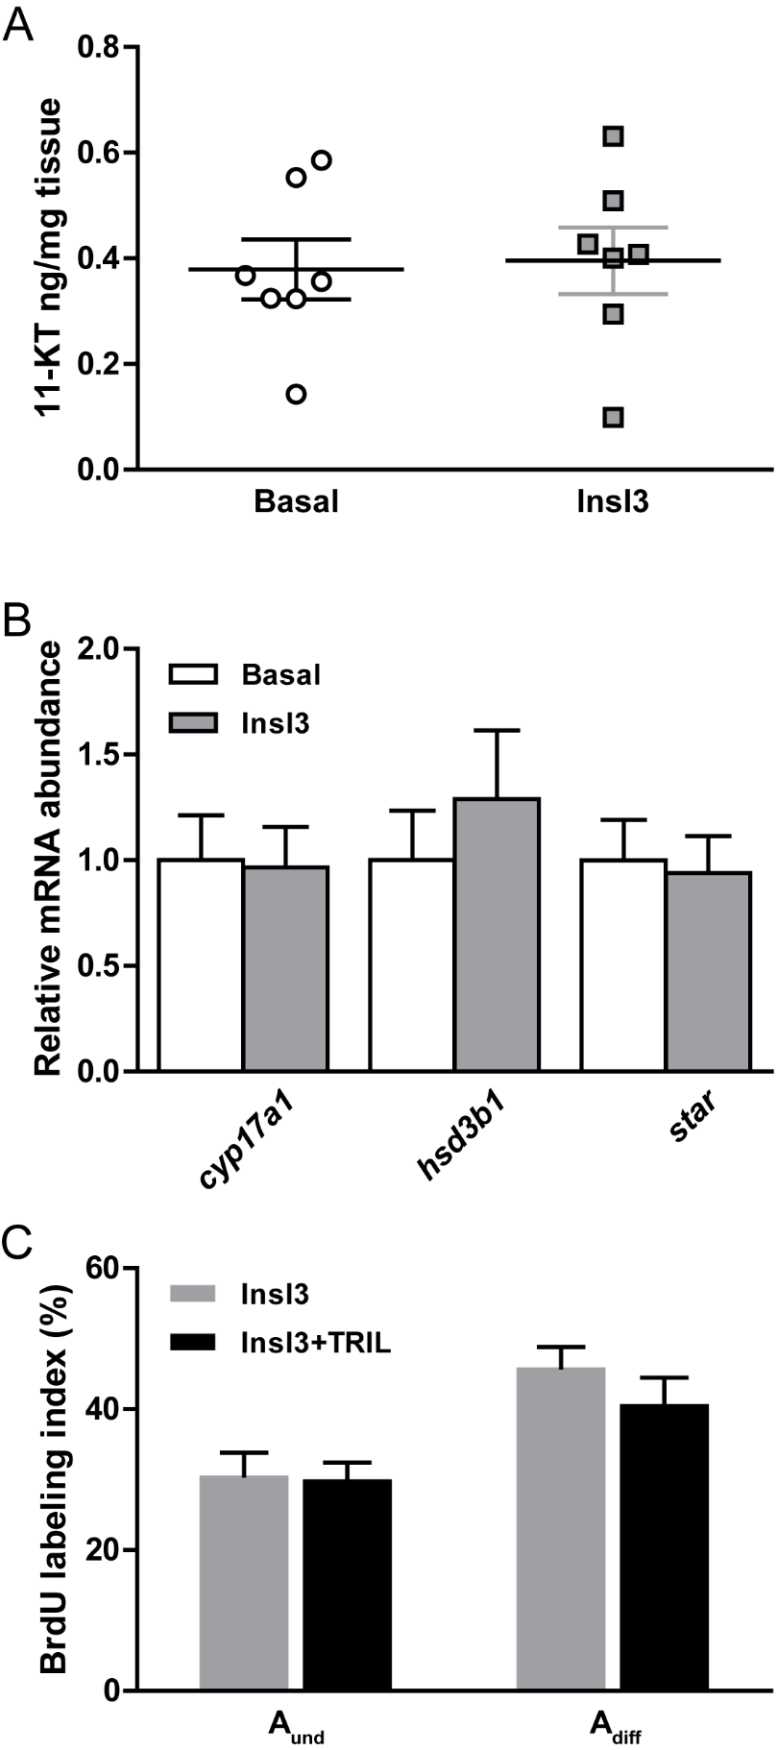


**Supplementary Fig. 5.** **Insl3-induced effects on spermatogenesis are steroid-independent in zebrafish.** **(A-B)** 11-ketotestosterone (11-KT) levels in medium (A) and steroid-related gene expression in testis tissue (B) after incubation in the absence or presence of 100 ng/mL Insl3 for 4 days. **(C)** Evaluation of the proliferation activity of type A spermatogonia in zebrafish testes cultured for 4 days with 100 ng/mL Insl3, and in the absence or presence of trilostane (TRIL; 25 μg/mL). In A and C, data are shown as mean ± SEM (N = 7), and in B as mean fold change ± SEM (N = 11) and expressed relative to the basal control group (which is set at 1).


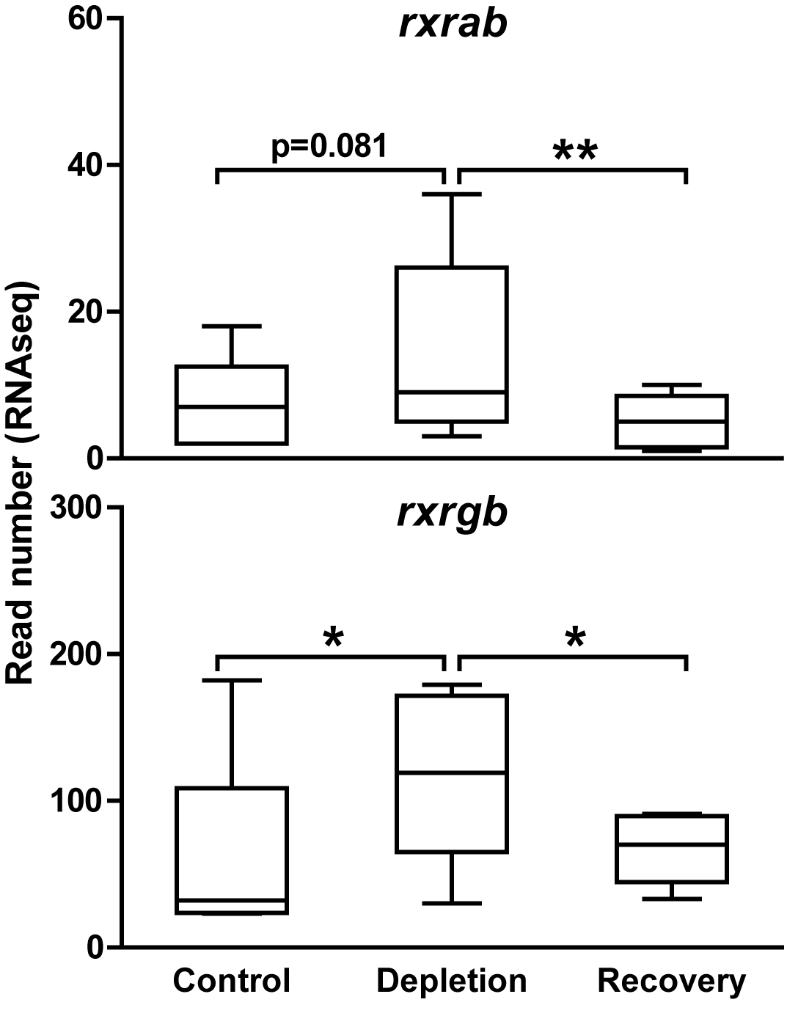


**Supplementary Fig. 6.** **Testicular expression of selected retinoid X receptors in control, depleted andrecovering gonads.** Expression levels of *rxrab* and *rxrgb* in control, germ cell-depleted (by exposure to the cytostatic agent busulfan1), and testes with recovering (from busulfan) spermatogenesis, as described by Crespo et al.2 (NCBI GEO data set GSE116611). Data are expressed as mean ± SEM (N = 5; *, p < 0.05; *, p < 0.01).

**Supplementary Table 1. Mapping statistics and complete list of differentially expressed genes identified by RNAseq (N = 3; p < 0.05) in Insl3-treated testis tissue.**

The table is attached as an independent file.

**Supplementary Table 2. Sequences of primers used in gene expression analyses by qPCR.**

| Target gene | Gene description | Primers | Primer sequence (5´→ 3') |
| --- | --- | --- | --- |
| *aldh1a2* | aldehyde dehydrogenase 1 family, member A2 | 4359 (Fw)  4360 (Rv) | CGCTGGATGGGCAGATAAGA  TCTGGTGAGGGTGAAAAATTCTC |
| *amh* | anti-Mullerian hormone | 4486 (Fw)  4487 (Rv) | CTCTGACCTTGATGAGCCTCATTT  GGATGTCCCTTAAGAACTTTTGCA |
| *casp9* | caspase 9, apoptosis-related cysteine peptidase | 6169 (Fw)  6170 (Rv) | ACATACGACTGCTGTGTGGTCAT  GAACTGCACCAGGGAATCGA |
| *cyp17a1* | cytochrome P450, family 17, subfamily A, polypeptide 1 | 2773 (Fw)  2774 (Rv) | GGGAGGCCACGGACTGTTA  CCATGTGGAACTGTAGTCAGCAA |
| *cyp26a1* | cytochrome P450, family 26, subfamily A, polypeptide 1 | 4383 (Fw)  4384 (Rv) | TGGGCTTGCCGTTCATTG  CATGCGCAGAAACTTCCTTCTC |
| *eef1a1l1* | eukaryotic translation elongation factor 1 alpha 1, like 1 | 2476 (Fw)  2477 (Rv) | GCCGTCCCACCGACAAG  CCACACGACCCACAGGTACAG |
| *gsdf* | gonadal somatic cell derived factor | 2366 (Fw)  2367 (Rv) | CATCTGCGGGAGTCATTGAAA  CAGAGTCCTCCGGCAAGCT |
| *hsd3b1* | hydroxy-delta-5-steroid dehydrogenase, 3 beta- and steroid delta-isomerase 1 | 5096 (Fw)  5097 (Rv) | GATCCGACTGCTGGATAGAAACA  CCCGGCAATCATCAAGAGA |
| *insl3* | insulin-like 3 (Leydig cell) | 2466 (Fw)  2467 (Rv) | TCGCATCGTGTGGGAGTTT  TGCACAACGAGGTCTCTATCCA |
| *rpl13a* | ribosomal protein L13a | 3998 (Fw)  3999 (Rv) | GAGCCCCCAGCAGAATCTTC  AGCCTGACCCCTCTTGGTTTT |
| *rxfp2a* | relaxin family peptide receptor 2a | 3258 (Fw)  3259 (Rv) | CAATTCCAGTCTCTGTCAGCACAT  CTCAACGTCATTCTCCGCAAA |
| *rxfp2b* | relaxin family peptide receptor 2b | 3262 (Fw)  3263 (Rv) | CTGCCAGACTCTGTGCCCATA  AGTCGTGATGCTATTACCCTCGAA |
| *star* | steroidogenic acute regulatory protein | 2546 (Fw)  2547 (Rv) | CCTGGAATGCCTGAGCAGAA  ATCTGCACTTGGTCGCATGAC |
| *ubc* | ubiquitin C | 3951 (Fw)  3952 (Rv) | CCATACACCGCACTCTTACAGAAA  CCAGTCAGCGTCTTCACAAAGAT |
| *xiap* | X-linked inhibitor of apoptosis | 6159 (Fw)  6160 (Rv) | CATCCCATTGACCCTGAGAGA  CCTCCACATCTGAAGCACATCA |

Fw, forward; Rv, reverse.

**References**

1 Nobrega, R. H. *et al.* Spermatogonial stem cell niche and spermatogonial stem cell transplantation in zebrafish. *PLoS One* **5**, doi:10.1371/journal.pone.0012808 (2010).

2 Crespo, D. *et al.* Endocrine and local signaling interact to regulate spermatogenesis in zebrafish: follicle-stimulating hormone, retinoic acid and androgens. *Development* **146**, doi:10.1242/dev.178665 (2019).

3 Elmore, S. Apoptosis: a review of programmed cell death. *Toxicol Pathol* **35**, 495-516, doi:10.1080/01926230701320337 (2007).
